# Supplementary material
Source: ML conference proceedings conference paper supplement (https://proceedings.mlr.press/v108/zhao20a.html)
Supplement: Supplementary file 1 [file zhao20a-supp.pdf]

## A Proof of Lemma 3

*Proof of Lemma 3.* We first prove the upper bound of  $A_t$ . The essential proof is actually due to Cheung et al. [2019a] in analyzing sliding window based approach. For self-containedness, we restate here in the notations of our proposed restarted strategy.

$$\begin{aligned} & \left\| V_{t-1}^{-1} \left( \sum_{s=t_0}^{t-1} X_s X_s^T (\theta_s - \theta_t) \right) \right\|_2 \\ &= \left\| V_{t-1}^{-1} \left( \sum_{s=t_0}^{t-1} X_s X_s^T \left( \sum_{p=s}^{t-1} (\theta_p - \theta_{p+1}) \right) \right) \right\|_2 \\ &= \left\| V_{t-1}^{-1} \left( \sum_{p=t_0}^{t-1} \left( \sum_{s=t_0}^p X_s X_s^T (\theta_p - \theta_{p+1}) \right) \right) \right\|_2 \quad (21) \end{aligned}$$

$$\leq \sum_{p=t_0}^{t-1} \left\| V_{t-1}^{-1} \left( \sum_{s=t_0}^p X_s X_s^T (\theta_p - \theta_{p+1}) \right) \right\|_2 \quad (22)$$

$$\leq \sum_{p=t_0}^{t-1} \lambda_{\max} \left( V_{t-1}^{-1} \left( \sum_{s=t_0}^p X_s X_s^T \right) \right) \|\theta_p - \theta_{p+1}\|_2 \quad (23)$$

$$\leq \|\theta_p - \theta_{p+1}\|_2, \quad (24)$$

where (21) holds by rearranging over the index pair of  $(s, p)$ , (22) holds due to the triangle inequality, (23) and (24) can be obtained by the same argument in Appendix B of Cheung et al. [2019b]. We thus prove the upper bound of  $A_t$ .

We proceed to prove the upper bound of  $B_t$ . From the self-normalized concentration inequality [Abbasi-Yadkori et al., 2011, Theorem 1], restated in Theorem 5 of Appendix C, we know that

$$\begin{aligned} & \left\| \sum_{s=t_0}^{t-1} \eta_s X_s \right\|_{V_{t-1}^{-1}} \\ & \stackrel{(32)}{\leq} \sqrt{2R^2 \log \left( \frac{\det(V_{t-1})^{1/2} \det(\lambda I)^{-1/2}}{\delta} \right)} \\ & \leq R \sqrt{2 \log \frac{1}{\delta} + d \log \left( 1 + \frac{(t-t_0)L^2}{d} \right)}, \end{aligned}$$

where the last inequality is obtained from the analysis of the determinant, as shown in the proof of Lemma 4.

Meanwhile, since  $V_{t-1} \succeq \lambda I$ , we know that

$$\|\lambda \theta_t\|_{V_{t-1}^{-1}}^2 \leq 1/\lambda_{\min}(V_{t-1}) \|\lambda \theta_t\|_2^2 \leq \frac{1}{\lambda} \|\lambda \theta_t\|_2^2 \leq \lambda S^2.$$

Therefore, the upper bound of  $B_t$  can be immediately obtained by combining the above inequalities.  $\square$

## B Bandit-over-Bandits Mechanism and Proof of Theorem 4

The RestartUCB algorithm requires prior information of the path-length  $P_T$ , which is generally unknown. Such a limitation can be avoided by utilizing the Bandits-over-bandits (BOB) mechanism, proposed by Cheung et al. [2019a] in designing parameter-free algorithm for non-stationary linear bandits based on sliding window least square estimator.

In the following, we first describe how to apply the BOB mechanism to eliminate the requirement of the unknown path-length in RestartUCB. Then, we present the proof of Theorem 4.

### B.1 RestartUCB with BOB Mechanism

We name the RestartUCB algorithm with Bandit-over-Bandits mechanism as ‘‘RestartUCB-BOB’’, whose main idea is illustrated in Figure 4.

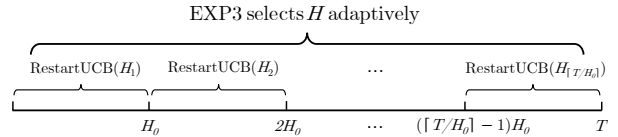

Figure 4: Illustration of Bandit-over-Bandits mechanism with application to RestartUCB algorithm.

From a high-level view, although the exact value of the optimal epoch size (or equivalently, the path-length  $P_T$ ) is not clear, we can make some random guesses of its possible value, since the  $P_T$  is always bounded. Then, we can use a certain meta-algorithm to adaptively track the best epoch size, based on the returned reward returned. Specifically, The RestartUCB-BOB algorithm first sets an update period  $H_0$ , and then runs the RestartUCB with a particular epoch size in each period, and the epoch size will be adaptively adjusted by employing EXP3 [Auer et al., 2002] as the meta-algorithm. We refer the reader to Section 7.3 of Cheung et al. [2019b] for more descriptions of design motivations and algorithmic details.

In the configuration of RestartUCB-BOB, we set  $H_0 = \lceil d\sqrt{T} \rceil$  and the pool of epoch sizes  $J$  as

$$J = \{H_i = \lfloor (d/(2S))^{2/3} \cdot 2^{i-1} \rfloor \mid i = 1, 2, \dots, N\},$$

where  $N = \lceil \ln(d^{1/3} T^{1/2} (2S)^{2/3}) \rceil + 1$ .

Denoted by  $H_{\min}$  ( $H_{\max}$ ) the minimal (maximal) epoch size in the pool  $J$ , we know that

$$H_{\min} = \lfloor (d/(2S))^{2/3} \rfloor, H_{\max} = \lfloor d\sqrt{T} \rfloor \leq H_0. \quad (25)$$

## B.2 Proof of Theorem 4

*Proof of Theorem 4.* We begin with the following decomposition of the dynamic regret.

$$\begin{aligned}
 & \sum_{t=1}^T \langle X_t^*, \theta_t \rangle - \langle X_t, \theta_t \rangle \\
 = & \underbrace{\sum_{t=1}^T \langle X_t^*, \theta_t \rangle - \sum_{i=1}^{\lceil T/H_0 \rceil} \sum_{t=(i-1)H_0+1}^{iH_0} \langle X_t(H^\dagger), \theta_t \rangle}_{\text{term (i)}} \\
 & + \underbrace{\sum_{i=1}^{\lceil T/H_0 \rceil} \sum_{t=(i-1)H_0+1}^{iH_0} \langle X_t(H^\dagger), \theta_t \rangle - X_t(H_i), \theta_t \rangle}_{\text{term (ii)}},
 \end{aligned}$$

where  $H^\dagger$  is the best epoch size to approximate the optimal epoch size  $H^*$  in the pool  $J$ , and  $H^* = \lfloor (dT/(1+P_T))^{2/3} \rfloor$ . Hence, it suffices to bound terms (i) and (ii). In the following, we consider two cases, either  $(1+P_T) \geq d^{-1/2}T^{1/4}$  or  $(1+P_T) < d^{-1/2}T^{1/4}$ .

**Case 1.** when  $(1+P_T) \geq d^{-1/2}T^{1/4}$ .

In this case, it is easy to verify that  $H^* \leq H_{\max}$  and we thus conclude that  $H^*$  lies in the the range of  $[H_{\min}, H_{\max}]$ . Furthermore, from the configuration of the pool  $J$ , we confirm that there exists an epoch size  $H^\dagger \in J$  such that  $H^\dagger \leq H^* \leq 2H^\dagger$ . So term (ii) can be upper bounded by

$$\text{term (ii)} \leq \sum_{i=1}^{\lceil T/H_0 \rceil} \tilde{O}\left(H^\dagger P_i + \frac{dH_0}{\sqrt{H^\dagger}}\right) \quad (26)$$

$$\begin{aligned}
 & = \tilde{O}\left(H^\dagger P_T + \frac{dT}{\sqrt{H^\dagger}}\right) \quad (27) \\
 & \leq \tilde{O}\left(H^* P_T + \frac{dT}{\sqrt{2H^*}}\right) \\
 & = \tilde{O}(d^{2/3}P_T^{1/3}T^{2/3}),
 \end{aligned}$$

where (26) is due to Theorem 2 and  $P_i$  denotes the path-length in the  $i$ -th update period. (27) follows by summing over all update periods, and the last inequality holds since the optimal epoch size  $H^*$  is provably in the range of  $[H_{\min}, H_{\max}]$  and satisfies  $H^\dagger \leq H^* \leq 2H^\dagger$ .

Next, we bound the term (i),

$$\begin{aligned}
 \text{term (i)} & \leq \tilde{O}(\sqrt{H_0NT}) \\
 & \leq \tilde{O}(d^{1/2}T^{3/4}) \quad (28) \\
 & \leq \tilde{O}(d^{2/3}T^{2/3}(1+P_T)^{1/3}),
 \end{aligned}$$

where the first inequality follows by the same argument as in the sliding window based approach [Cheung et al., 2019b, Lemma 13], building upon the of EXP3. In

addition, the last inequality holds due to the fact that  $(1+P_T) \geq d^{-1/2}T^{1/4}$  implies,

$$d^{1/2}T^{3/4} = d^{2/3}T^{2/3}d^{-1/3}T^{1/6} \leq d^{2/3}T^{2/3}(1+P_T)^{1/3}.$$

Hence, by combining the upper bounds of term (i) and term (ii), we know that the dynamic regret of RestartUCB-BOB is bounded by  $\tilde{O}(d^{2/3}T^{2/3}(1+P_T)^{1/3})$  under the condition of  $(1+P_T) \geq d^{-1/2}T^{1/4}$ .

**Case 2.** when  $(1+P_T) < d^{-1/2}T^{1/4}$ .

In this case, we cannot guarantee that the optimal epoch size  $H^*$  lies in the range of  $[H_{\min}, H_{\max}]$ , so we set  $H^\dagger$  as  $H_0$ ,

$$\begin{aligned}
 \text{term (ii)} & \leq \tilde{O}\left(H^\dagger P_T + \frac{dT}{\sqrt{H^\dagger}}\right) \\
 & \leq \tilde{O}\left(H_0 P_T + \frac{dT}{\sqrt{H_0}}\right) \\
 & = \tilde{O}\left(d\sqrt{T}P_T + d^{1/2}T^{3/4}\right) \\
 & \leq \tilde{O}\left(d^{1/2}T^{3/4}\right)
 \end{aligned}$$

where the last inequality holds by exploiting the condition of  $(1+P_T) \leq d^{-1/2}T^{1/4}$ . The result in conjunction with the upper bound of term (i) in (28) gives the  $\tilde{O}(d^{1/2}T^{3/4})$  dynamic regret under this condition.

Finally, note that the dynamic regret of above two cases can be rewritten in the following unified form,

$$\text{term (i)} + \text{term (ii)} \leq \tilde{O}\left(d^{2/3}T^{2/3}(\max\{P_T, d^{-1/2}T^{1/4}\})^{1/3}\right).$$

Hence, we complete the proof of Theorem 4.  $\square$

## C Technical Lemmas

In this section, we provide several technical lemmas that frequently used in the proofs.

**Theorem 5** (Self-Normalized Bound for Vector-Valued Martingales [Abbasi-Yadkori et al., 2011, Theorem 1]). *Let  $\{F_t\}_{t=0}^\infty$  be a filtration. Let  $\{\eta_t\}_{t=0}^\infty$  be a real-valued stochastic process such that  $\eta_t$  is  $F_t$ -measurable and conditionally  $R$ -sub-Gaussian for some  $R > 0$ , namely,*

$$\forall \lambda \in \mathbb{R}, \quad \mathbb{E}[\exp(\lambda\eta_t)|F_{t-1}] \leq \exp\left(\frac{\lambda^2 R^2}{2}\right). \quad (29)$$

*Let  $\{X_t\}_{t=1}^\infty$  be an  $\mathbb{R}^d$ -valued stochastic process such that  $X_t$  is  $F_{t-1}$ -measurable. Assume that  $V$  is a  $d \times d$  positive definite matrix. For any  $t \geq 0$ , define*

$$\bar{V}_t = V + \sum_{\tau=1}^t X_\tau X_\tau^\top, \quad S_t = \sum_{\tau=1}^t \eta_\tau X_\tau. \quad (30)$$

Then, for any  $\delta > 0$ , with probability at least  $1 - \delta$ , for all  $t \geq 0$ ,

$$\|S_t\|_{\bar{V}_t}^2 \leq 2R^2 \log \left( \frac{\det(\bar{V}_t)^{1/2} \det(V)^{-1/2}}{\delta} \right). \quad (31)$$

**Lemma 4** (Elliptical Potential Lemma). *Suppose  $U_0 = \lambda I$ ,  $U_t = U_{t-1} + X_t X_t^\top$ , and  $\|X_t\|_2 \leq L$ , then*

$$\sum_{t=1}^T \|U_{t-1}^{-\frac{1}{2}} X_t\|_2 \leq \sqrt{2dT \log \left( 1 + \frac{L^2 T}{\lambda d} \right)}. \quad (32)$$

*Proof.* First, we have the following decomposition,

$$U_t = U_{t-1} + X_t X_t^\top = U_{t-1}^{\frac{1}{2}} (I + U_{t-1}^{-\frac{1}{2}} X_t X_t^\top U_{t-1}^{-\frac{1}{2}}) U_{t-1}^{\frac{1}{2}}.$$

Taking the determinant on both sides, we get

$$\det(U_t) = \det(U_{t-1}) \det(I + U_{t-1}^{-\frac{1}{2}} X_t X_t^\top U_{t-1}^{-\frac{1}{2}}),$$

which in conjunction with Lemma 5 yields

$$\begin{aligned} \det(U_t) &= \det(U_{t-1}) (1 + \|U_{t-1}^{-\frac{1}{2}} X_t\|_2^2) \\ &\geq \det(U_{t-1}) \exp(\|U_{t-1}^{-\frac{1}{2}} X_t\|_2^2 / 2). \end{aligned}$$

Note that in the first inequality, we utilize the fact that  $1 + x \geq \exp(x/2)$  holds for any  $x \in [0, 1]$ . By taking advantage of the telescope structure, we have

$$\sum_{t=1}^T \|U_{t-1}^{-\frac{1}{2}} X_t\|_2^2 \leq 2 \log \frac{\det(U_T)}{\det(U_0)} \leq 2d \log \left( 1 + \frac{L^2 T}{\lambda d} \right),$$

where the last inequality follows from the fact that  $\text{Tr}(U_T) \leq \text{Tr}(U_0) + L^2 T = \lambda d + L^2 T$ , and thus  $\det(U_T) \leq (\lambda + L^2 T/d)^d$ .

Therefore, Cauchy-Schwartz inequality gives,

$$\begin{aligned} \sum_{t=1}^T \|U_{t-1}^{-\frac{1}{2}} X_t\|_2 &\leq \sqrt{T \sum_{t=1}^T \|U_{t-1}^{-\frac{1}{2}} X_t\|_2^2} \\ &\leq \sqrt{2dT \log \left( 1 + \frac{L^2 T}{\lambda d} \right)}. \end{aligned}$$

□

**Lemma 5.**

$$\det(I + \mathbf{v} \mathbf{v}^\top) = 1 + \|\mathbf{v}\|_2^2. \quad (33)$$

*Proof.* Notice that

- (i)  $(I + \mathbf{v} \mathbf{v}^\top) \mathbf{v} = (1 + \|\mathbf{v}\|_2^2) \mathbf{v}$ , therefore,  $\mathbf{v}$  is its eigenvector with  $(1 + \|\mathbf{v}\|_2^2)$  as the eigenvalue;
- (ii)  $(I + \mathbf{v} \mathbf{v}^\top) \mathbf{v}^\perp = \mathbf{v}^\perp$ , therefore,  $\mathbf{v}^\perp \perp \mathbf{v}$  is its eigenvector with 1 as the eigenvalue.

Consequently,  $\det(I + \mathbf{v} \mathbf{v}^\top) = 1 + \|\mathbf{v}\|_2^2$ . □
